# Supplementary material
Source: publisher site journal article supplement (https://www.dovepress.com/article/340478)
Supplement: Supplementary file 1 [file get_supplementary_file.php]

**Supplementary file caption**

**Supplementary file.** The calculator of sarcopenia score and predicted risk of major postoperative complications.
